# Supplementary material for: Synthesis, characterization, cellular uptake and cytotoxicity of a multi-functional magnetic nanocomposite for the targeted delivery and controlled release of doxorubicin to cancer cells
Source: Royal Society of Chemistry journal article supplement (doi:10.1039/c2jm31794j), 2012-01-01
Supplement: c2jm31794j.pdf [file c2jm31794j.pdf]

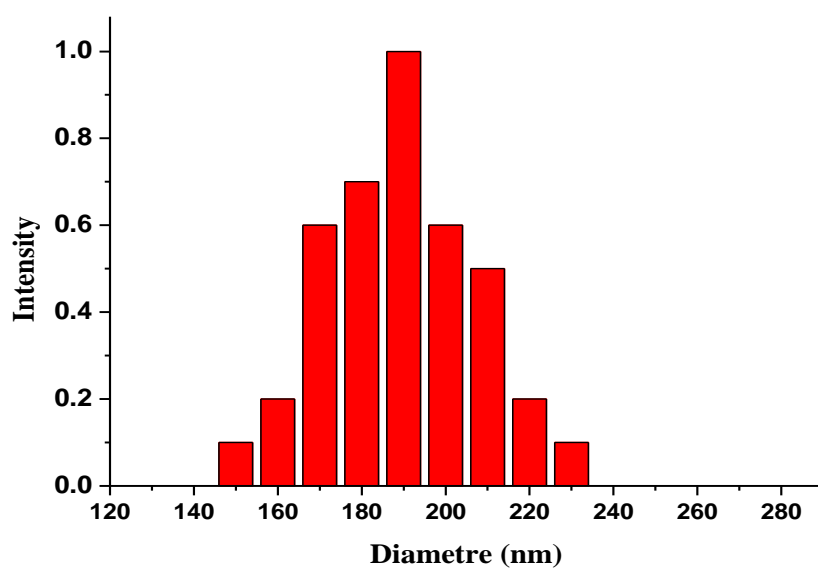

Fig. S1. DLS data of DOX-loaded-CMCS-capped-MNP/MMT

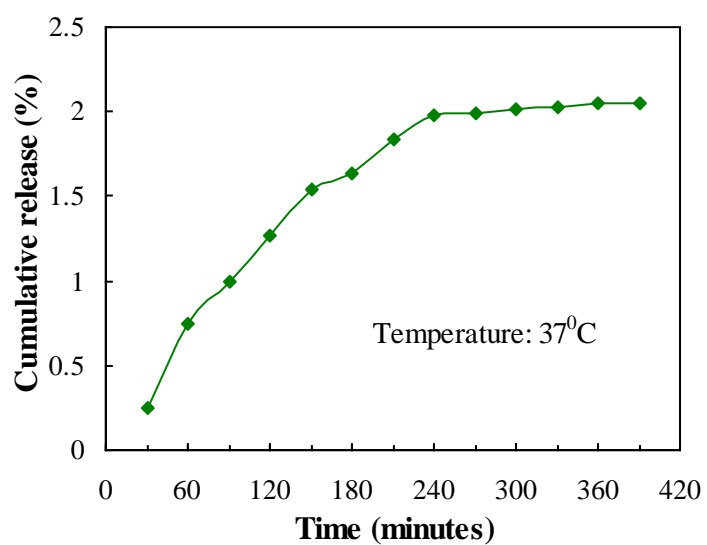

Fig. S2 Releasing profiles of coumarin-6 from the CMCS-capped-MNP/MMT
